# Supplementary material for: Crystalline nanotubular framework constructed by cucurbit[8]uril for selective CO2 adsorption
Source: Royal Society of Chemistry journal article supplement (doi:10.1039/c7cc02074k), 2017-01-01
Supplement: c7cc02074k1.pdf [file c7cc02074k1.pdf]

## Crystalline nanotubular framework constructed by cucurbit[8]uril for selective CO<sub>2</sub> adsorption

Pinpin Wang,<sup>a</sup> Yunlong Wu,<sup>a</sup> Yanxia Zhao,<sup>a</sup> Yang Yu,<sup>a</sup> Mingming Zhang<sup>b,\*</sup> and  
Liping Cao<sup>a,\*</sup>

*<sup>a</sup>Key Laboratory of Synthetic and Natural Functional Molecule Chemistry of the Ministry of  
Education, College of Chemistry and Materials Science, Northwest University, Xi'an, P. R. China.*

*E-mail: chcaoliping@nwu.edu.cn*

*<sup>b</sup>Department of Chemistry, University of Utah, Salt Lake City, UT 84112, USA*

*E-mail: mingming.zhang@utah.edu*

| Table of Contents                              | Pages |
|------------------------------------------------|-------|
| General experimental details                   | S2    |
| Synthetic procedures and characterization data | S2    |
| Job plot of CB[8]•MC                           | S3    |
| ESI-MS of CB[8]•MC                             | S3    |
| UV-vis titration for MC with CB[8]             | S4    |
| FTIR spectra                                   | S5    |
| X-ray crystal structure of <b>1</b>            | S6    |
| Thermal gravimetric analysis of <b>1</b>       | S10   |
| SEM images of <b>1</b> and amorphous CB[8]     | S10   |
| X-ray powder diffraction patterns of <b>1</b>  | S11   |
| Adsorption and desorption isotherm of <b>1</b> | S11   |

## General Experimental Details.

Starting materials were purchased from commercial suppliers were used without further purification. CB[8]<sup>1</sup> and MC<sup>2-4</sup> was prepared according to the published procedure. Melting points were determined using XT-4 apparatus. IR spectra were recorded on a Bruker IFS 120HR spectrometer and were reported in cm<sup>-1</sup>. <sup>1</sup>H and <sup>13</sup>C NMR spectra were done on a Bruker ascend spectrometer at 400MHz. Electron Spray Ionization (ESI) mass spectra were acquired by using a UltiMate3000 electrospray instrument. Thermal gravimetric analysis (TGA) experiments were performed on NETZSCH STA 449C Simultaneous Thermal Analyzer over the temperature 30–800°C in a nitrogen-gas atmosphere. X-ray powder diffraction (XRD) experiments were recorded on Bruker D8 ADVAHCL. The Scanning Electron Microscope (SEM) images were obtained on Hitachi SU8010microscope. Sorption isotherms were measured by a Micrometrics Tristar 3020 instrument. UV-Vis spectra were done on Agilent Cary-100.

## Synthetic Procedures and Characterization Data.

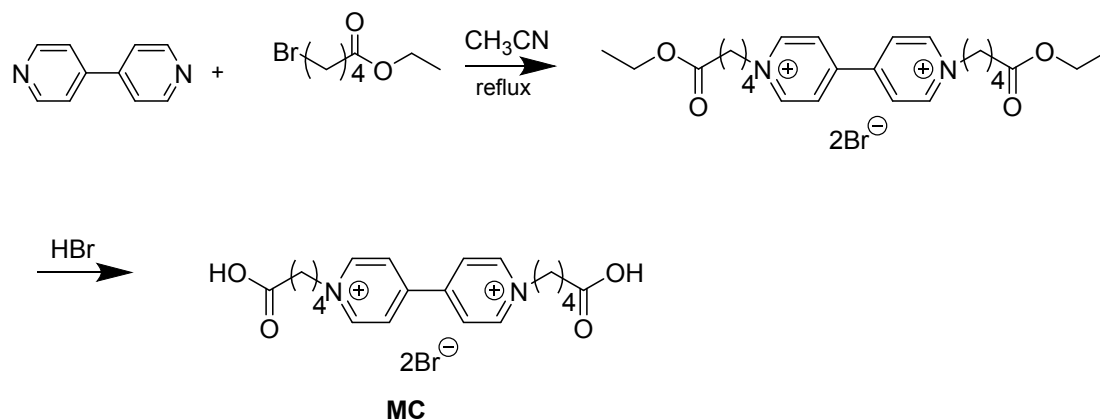

*Compound MC.* 4,4'-bipyridine (2.0 g, 12.8 mmol) and ethyl 5-bromovalerate (10.7 g, 51.2 mmol) were refluxed in acetonitrile (50 mL) for 28 hours. A precipitate produced was appeared and then filtered. The filter cake was washed with ethyl ether and then recrystallized from MeOH–Et<sub>2</sub>O provided to afford the yellow product. The yellow product was dissolved in 2 M aqueous HBr solution (15 mL) and left

standing for 2 days. Then the mixture was poured into 50 mL acetone and filtered. The precipitate was washed with acetone ( $3 \times 35$  mL) and dried in high vacuum. The  $^1\text{H}$  NMR spectrum matches that reported in the literature.<sup>2-4</sup>

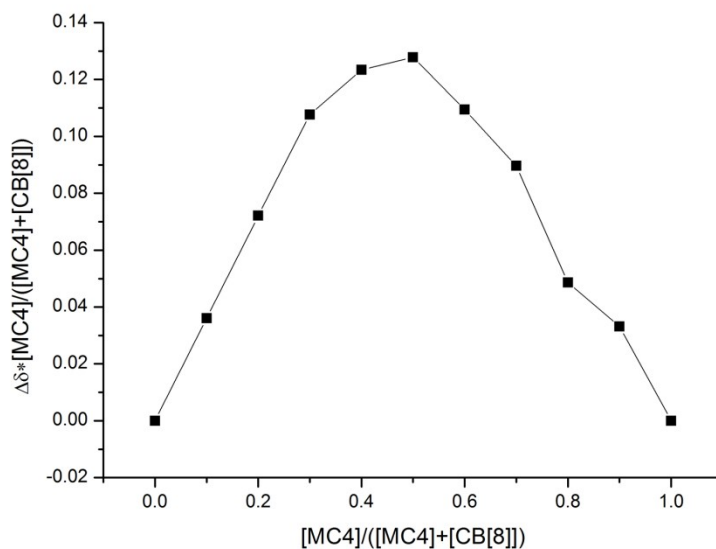

**Figure S1.** Job's plot obtained by recording  $^1\text{H}$  NMR spectra for the solution of **MC** and **CB[8]** in  $\text{D}_2\text{O}$  ( $[\text{MC}] + [\text{CB[8]}] = 1.0 \times 10^{-3}$  M), confirming the 1:1 stoichiometry of their complex.

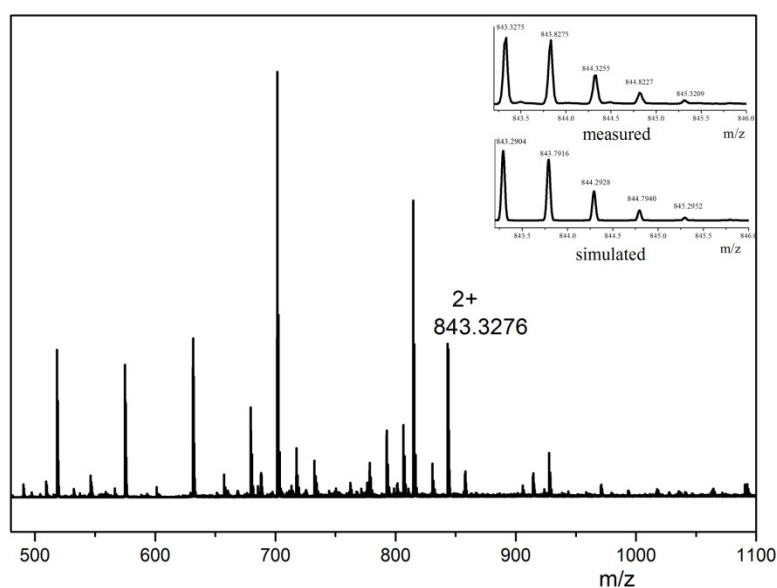

**Figure S9.** ESI-MS spectrum of **CB[8]** and **MC** in  $\text{H}_2\text{O}$ . Expansions confirm the expect  $m/z$  spacing of 0.5 for the  $2^+$  ion.

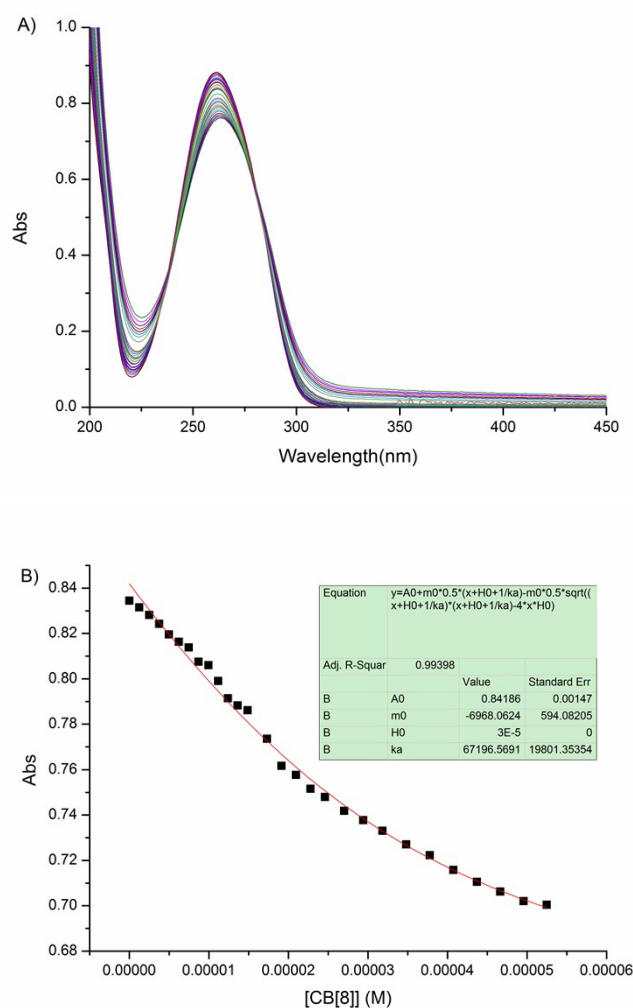

**Figure S10.a.** UV-vis titration absorption spectra of CB[8] and **MC**; b) Non-linear fitting curve of the intensity of absorbance changes of **MC** versus the concentration of CB[8].

The association constant  $K_a$  was calculated according to the following equation:

$$\text{Abs} = (\text{Abs}_{\text{max}}/[G]_0)(0.5[H] + 0.5([G]_0 + 1/K_a) - (0.5([H]^2 + (2[H](1/K_a - [G]_0)) + (1/K_a + [G]_0)^2)^{0.5}))$$

Where Abs is the intensity of absorbance of **MC** upon titration,  $\text{Abs}_{\text{max}}$  is the intensity of absorbance of **MC**,  $[G]_0$  is the fixed concentration of **MC** (0.00003 M),  $[H]$  is the concentration of added CB[8] (0.0015 M). Based on the above equation, the association constant ( $K_a$ ) of CB[8]·**MC** was calculated to be  $(6.7 \pm 1.9) \times 10^4 \text{ M}^{-1}$ .

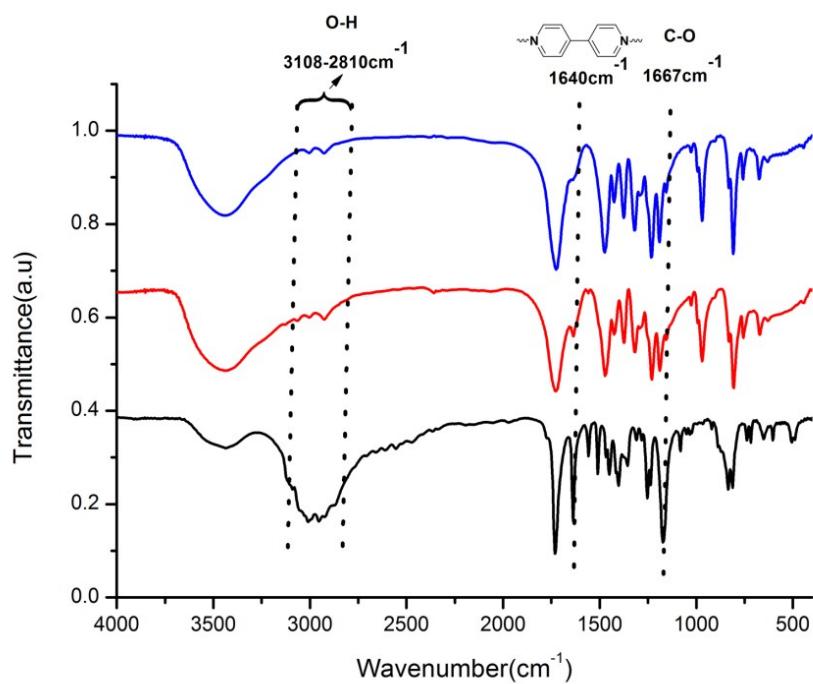

**Figure S4.** FTIR spectra of **MC** (black), crystal **1** (red) and amorphous of CB[8] (blue) obtained using KBr pellets.

## X-ray Crystal Structure Determination.

Data collections for **1** was performed on a Bruker SMART APEX II diffractometer at 153 K with graphite-monochromated Mo K $\alpha$  radiation ( $\lambda = 0.71073$  Å). SADABS<sup>5</sup> absorption correction was applied for the data. The structure was solved by direct methods using SHELXS-2014, while the refinements were done by the use of the SHELXL-2014 program.<sup>6</sup>

A mixture of CB[8] (66 mg, 0.05 mmol), **MC** (78 mg, 0.15 mmol) and 40 ml H<sub>2</sub>O was stirred for 30 seconds. After being filtered, supernate was transferred in tube. The colorless crystal **1** (25 mg, 38% yield) was got by slow evaporation after several days. C<sub>96</sub>H<sub>128</sub>Br<sub>6</sub>N<sub>64</sub>O<sub>61</sub>, M = 3634.08, Orthorhombic, *Pccn*, *a* = 25.909(5) Å, *b* = 26.983(5) Å, *c* = 13.028(2) Å,  $\alpha = 90^\circ$ ,  $\beta = 90^\circ$ ,  $\gamma = 90^\circ$ , *V* = 9108(3) Å<sup>3</sup>, *Z* = 2,  $\rho_{\text{calcd.}}$  = 1.325 g·cm<sup>-3</sup>, final *R*<sub>1</sub> = 0.1198 and *wR*<sub>2</sub> = 0.2610 (*R*<sub>int</sub> = 0.0463) for 54602 independent reflections [*I* > 2 $\sigma$ (*I*)]. There are several alert level B induced by some disordered solvent molecules. A severely disordered solvent H<sub>2</sub>O with 140 electrons were removed from the asymmetric unit by the SQUEEZE command,<sup>7</sup> which could correspond with the removal of 7.0 molecules of H<sub>2</sub>O per formula unit. CCDC 1534775 contains the supplementary crystallographic data for this paper. These data can be obtained free of charge from The Cambridge Crystallographic Data Centre via [www.ccdc.cam.ac.uk/data\\_request/cif](http://www.ccdc.cam.ac.uk/data_request/cif).

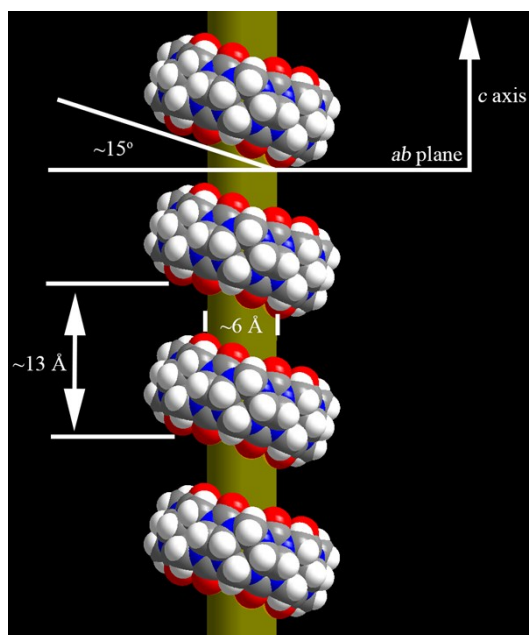

**Figure S5.** Side view of 1D nanotube in **1**. Color code: N, blue; O, red; C, gray. Water molecules and bromide ions are omitted.

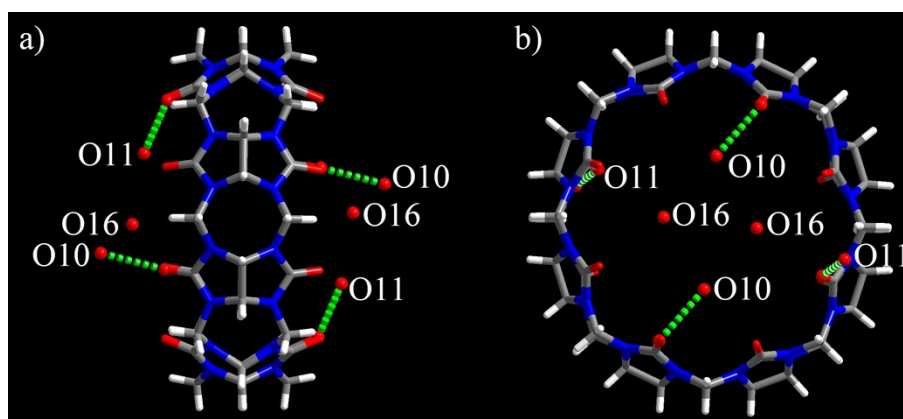

**Figure S6.** a) Side view and b) top view of CB[8] with isolated waters. Color code: N, blue; O, red; C, gray. H-bonds, green dotted line. Water molecules and bromide ions are omitted.

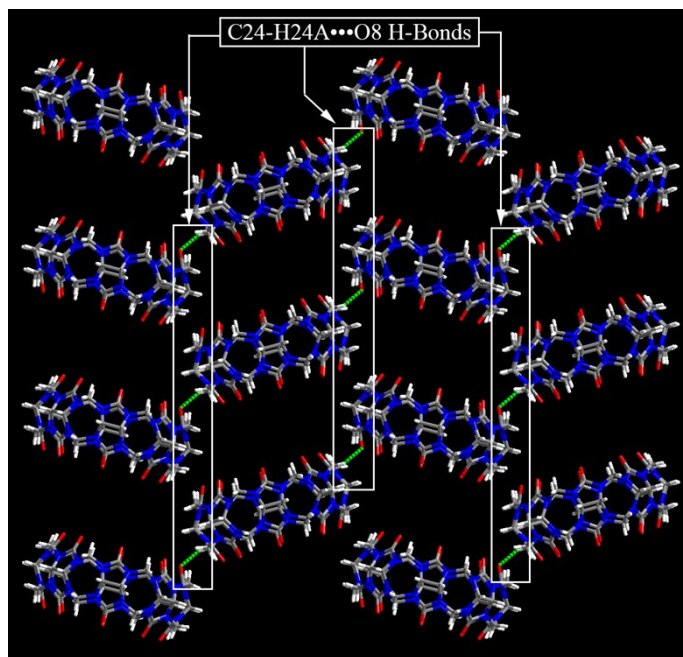

**Figure S7.** A 2D nanotubular layer formed by 1D nanotubes through non-classical hydrogen bonds. Color code: N, blue; O, red; C, gray. H-bonds, green dotted line. Water molecules and bromide ions are omitted.

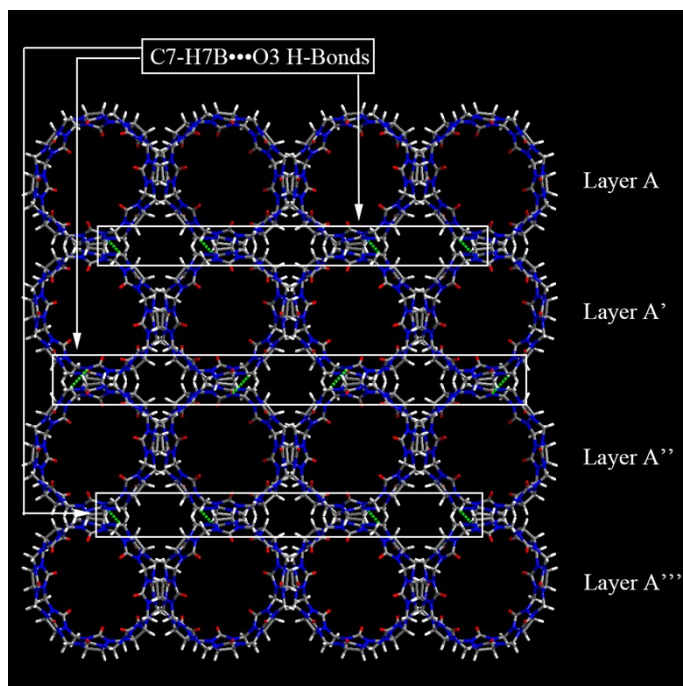

**Figure S8.** 2D nanotubular layers linked by through non-classical hydrogen bonds. Color code: N, blue; O, red; C, gray. H-bonds, green dotted line. Water molecules and bromide ions are omitted.



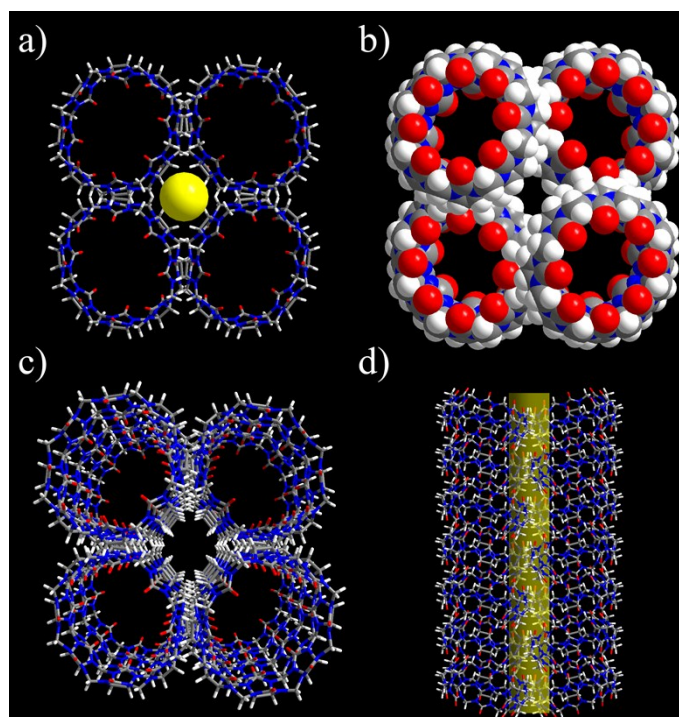

**Figure S9.** a) Top view, b) space-filling view, c) perspective view, and d) side view of 1D extrinsic nanochannel formed by the outer-surfaces of CB[8]. Color code: N, blue; O, red; C, gray. Water molecules and bromide ions are omitted.

**Table S1.** Parameters from O...O hydrogen bonds observed in **1**.

| Interactions | Distance (Å) | Interactions | Distance (Å) |
|--------------|--------------|--------------|--------------|
| O6...O9      | 2.88         | O15...O14    | 2.66         |
| O9...O12     | 2.91         | O14...O13    | 2.76         |
| O12...O5     | 2.82         | O13...O1     | 2.90         |
| O12...O15    | 2.94         | O13...O2     | 3.03         |
| O15...O4     | 2.98         | O7...O11     | 2.76         |
| O4...O10     | 2.88         |              |              |

**Table S2.** Parameters from C–H...O H-bonds observed in **1**.

| Interactions  | H...O (Å) | C...O (Å) | ∠C–H...O (°) |
|---------------|-----------|-----------|--------------|
| C24–H24A...O8 | 2.54      | 3.07      | 113.8        |
| C7–H7B...O3   | 2.60      | 3.10      | 111.3        |

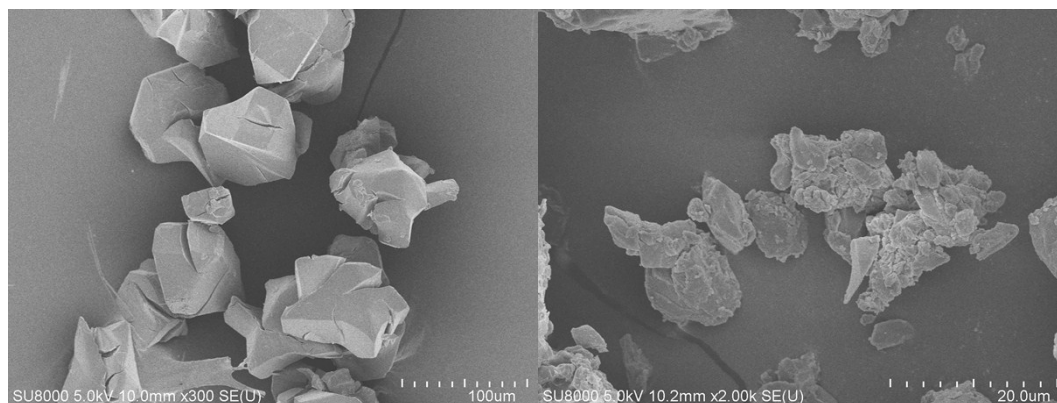

**Figure S10.** SEM images of **1** (left) and amorphous CB[8] (right).

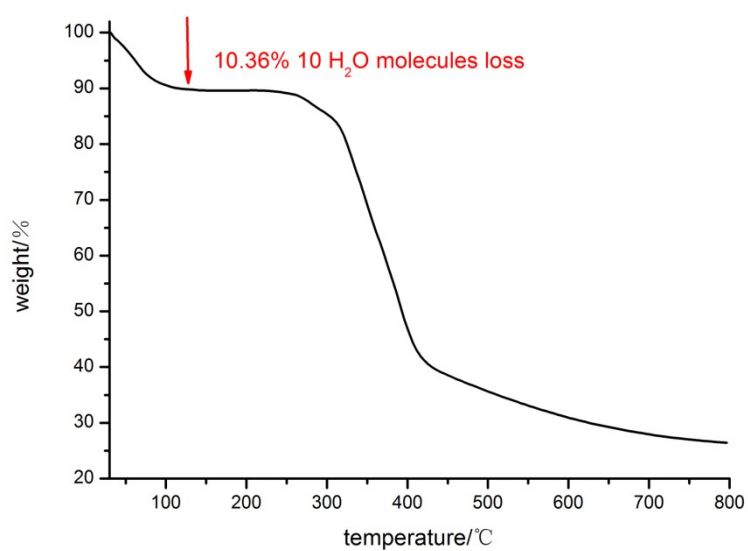

**Figure S11.** Thermal gravimetric analysis (TGA) curve for the crystal of **1**.

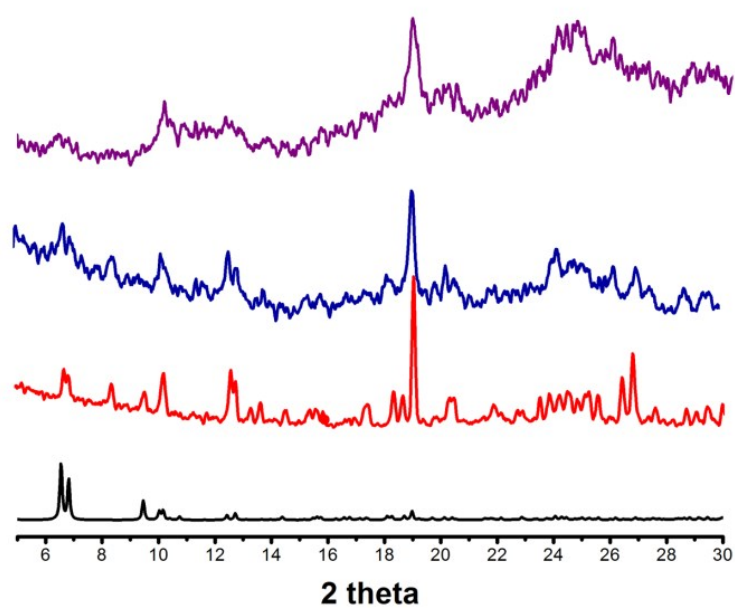

**Figure S12.** X-ray powder diffraction patterns of simulated (black), synthesized (red), activated (blue), after adsorbed (violet) **1**.

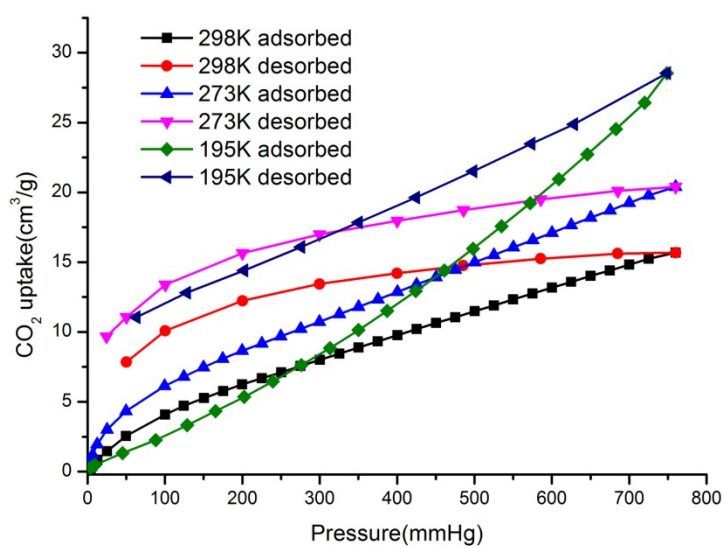

**Figure S13.** CO<sub>2</sub> adsorption and desorption isotherm of **1** at 195, 273 and 298 K.

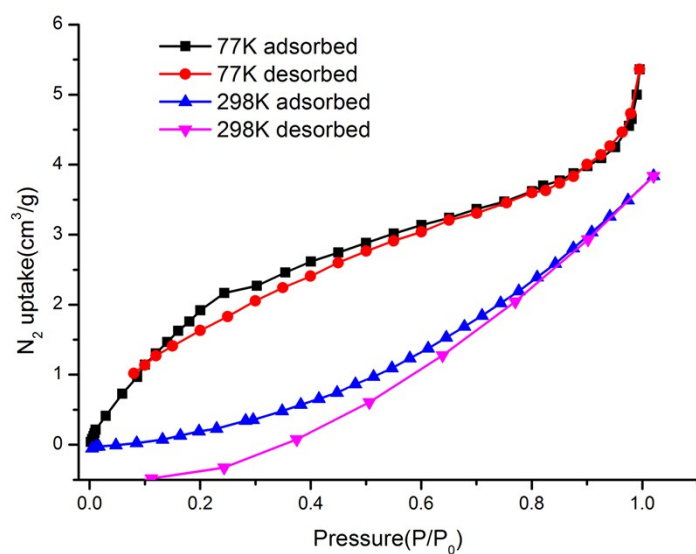

**Figure S14.** N<sub>2</sub> adsorption and desorption isotherm of **1** at 77 and 298 K.

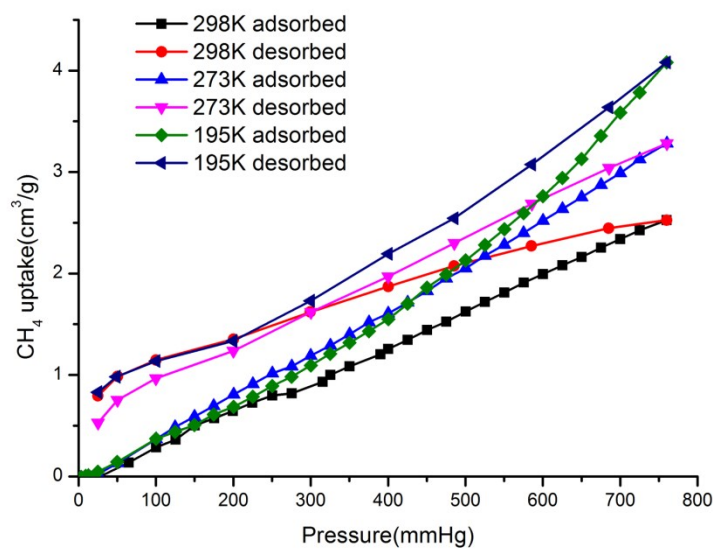

**Figure S15.** CH<sub>4</sub> adsorption and desorption isotherm of **1** at 195, 273 and 298 K.

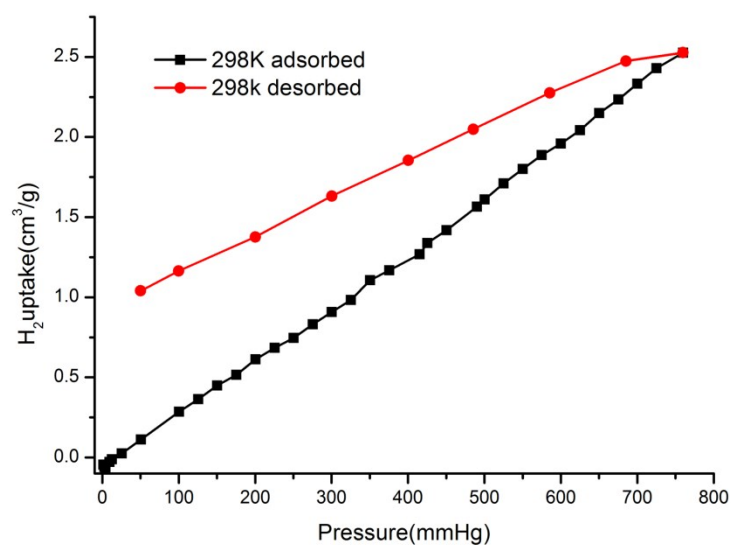

**Figure S16.** H<sub>2</sub> adsorption and desorption isotherm of **1** at 298K.

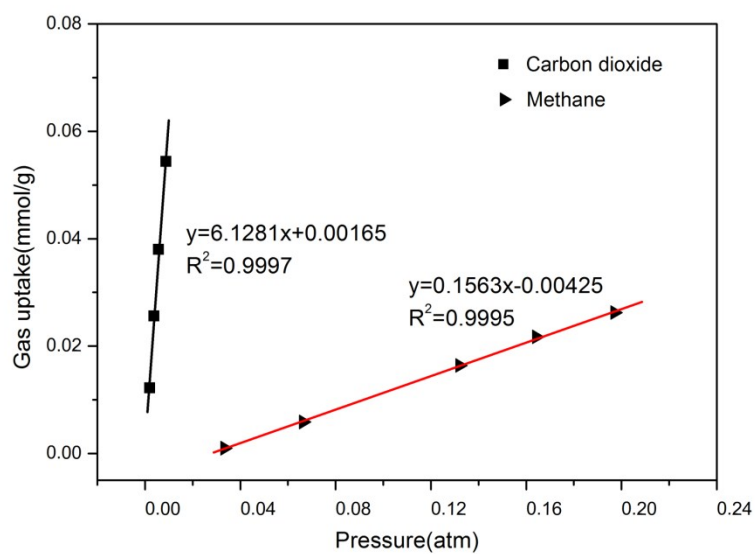

**Figure S17.** Initial slope calculation for CO<sub>2</sub> and CH<sub>4</sub> isotherms collected at 273K (CO<sub>2</sub>: black squares; CH<sub>4</sub>: red triangles).

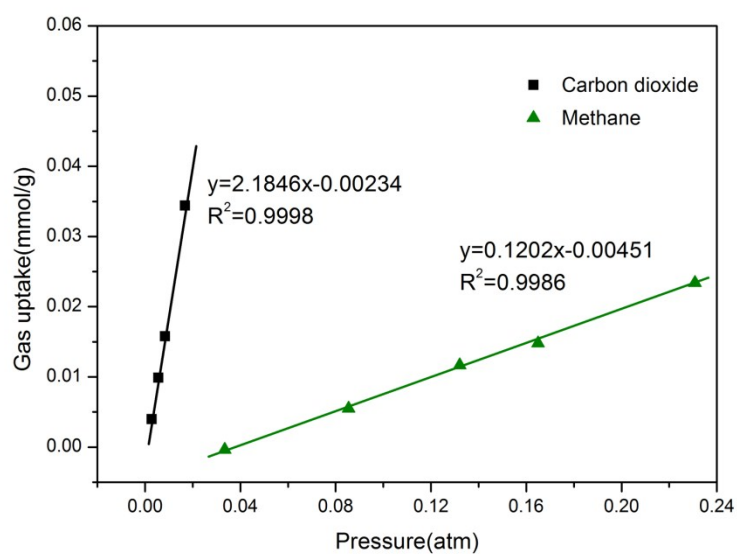

**Figure S18.** Initial slope calculation for CO<sub>2</sub> and CH<sub>4</sub> isotherms collected at 298K (CO<sub>2</sub>: black squares; CH<sub>4</sub>: green triangles).

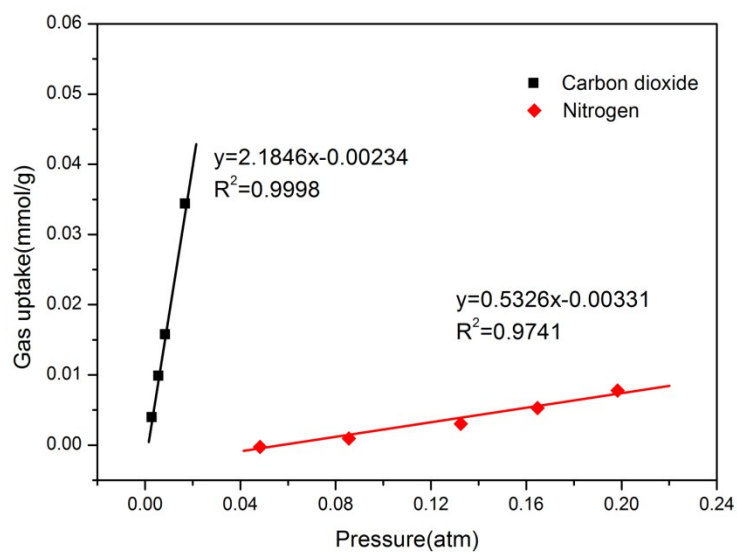

**Figure S19.** Initial slope calculation for CO<sub>2</sub> and N<sub>2</sub> isotherms collected at 298K (CO<sub>2</sub>: black squares; N<sub>2</sub>: red squares).

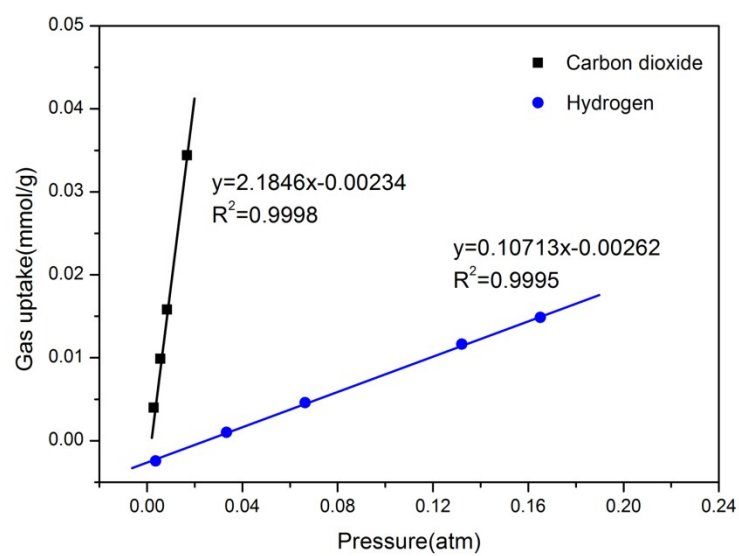

**Figure S20.** Initial slope calculation for CO<sub>2</sub> and H<sub>2</sub> isotherms collected at 298K (CO<sub>2</sub>: black squares; H<sub>2</sub>: blue circulars).

**Table S3.** Selective CO<sub>2</sub> uptake for a series of selected macrocycle-based organic molecular porous material.

| Material                           | BET/Lang<br>muir<br>surface<br>area [m <sup>2</sup> g<br>- <sup>1</sup> ] | CO <sub>2</sub><br>sorption<br>capacity<br>[mg g <sup>-1</sup> ]<br>298K | -ΔH<br>ads<br>(kJm<br>ol <sup>-1</sup> ) | Selectivity <sup>c</sup>         |                                 |                                 |
|------------------------------------|---------------------------------------------------------------------------|--------------------------------------------------------------------------|------------------------------------------|----------------------------------|---------------------------------|---------------------------------|
|                                    |                                                                           |                                                                          |                                          | CO <sub>2</sub> /CH <sub>4</sub> | CO <sub>2</sub> /H <sub>2</sub> | CO <sub>2</sub> /N <sub>2</sub> |
| CB[8] (1)                          | 34.5 <sup>a</sup> /47 <sup>b</sup>                                        | 28.2                                                                     | 37                                       | 18/39 <sup>d</sup>               | 20                              | 41                              |
| CB[6] <sup>8</sup>                 | 210 <sup>a</sup>                                                          | 96.8                                                                     | 33                                       | 14.8                             | -                               | -                               |
| CB[6](II) <sup>9</sup>             | 140 <sup>a</sup>                                                          | 136.7                                                                    | -                                        | -                                | -                               | 27                              |
| CB[7] <sup>10</sup><br>(amorphous) | 293 <sup>a</sup>                                                          | 101.2                                                                    | 40                                       | -                                | -                               | -                               |
| CB[8]<br>(amorphous)               | -                                                                         | 5.86                                                                     | -                                        | -                                | -                               | -                               |
| P5-SOF <sup>11</sup>               | 97 <sup>a</sup>                                                           | 88                                                                       | 44                                       | 375                              | -                               | 339                             |
| CalixMOM-1 <sup>12</sup>           | 236 <sup>b</sup>                                                          | ~45                                                                      | 40                                       | 9                                | -                               | -                               |
| CalixMOM-2 <sup>12</sup>           | 184 <sup>a</sup> /208 <sup>b</sup>                                        | ~36                                                                      | 33                                       | 6                                | -                               | -                               |

a) BET surface area; b) Langmuir surface area; c) Data obtained at 298K; d) Data obtained at 273K.

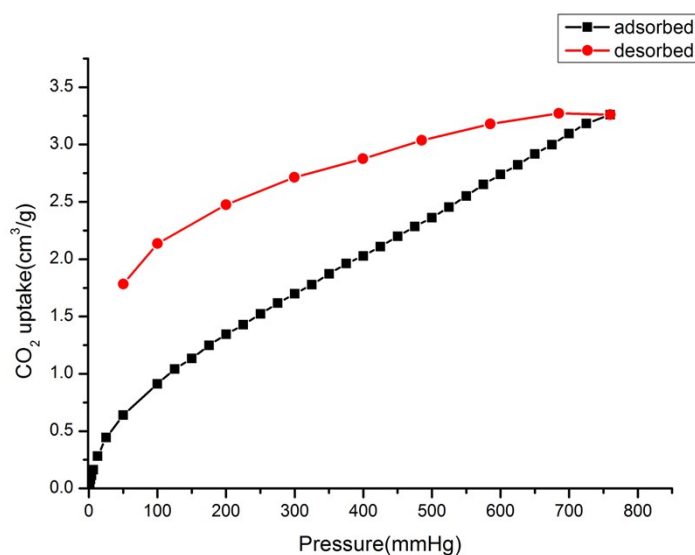

**Figure S21.** CO<sub>2</sub> adsorption and desorption for amorphous CB[8] at 298K.



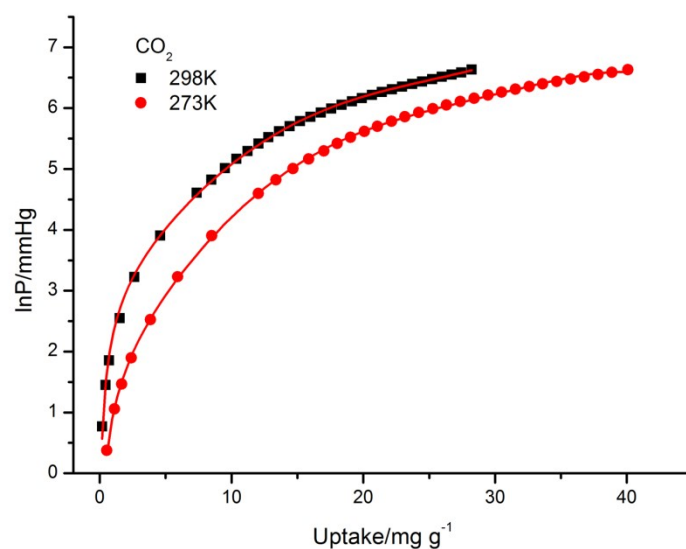

**Figure S22.** Virial analysis of the CO<sub>2</sub> adsorption data for **1** at 273 and 298 K. Fitting results:  $a_0 = -4489.84$ ,  $a_1 = 170.24$ ,  $a_2 = 1.82$ ,  $a_3 = -0.32$ ,  $\chi^2 = 0.00166$ ,  $R^2 = 0.99939$ .

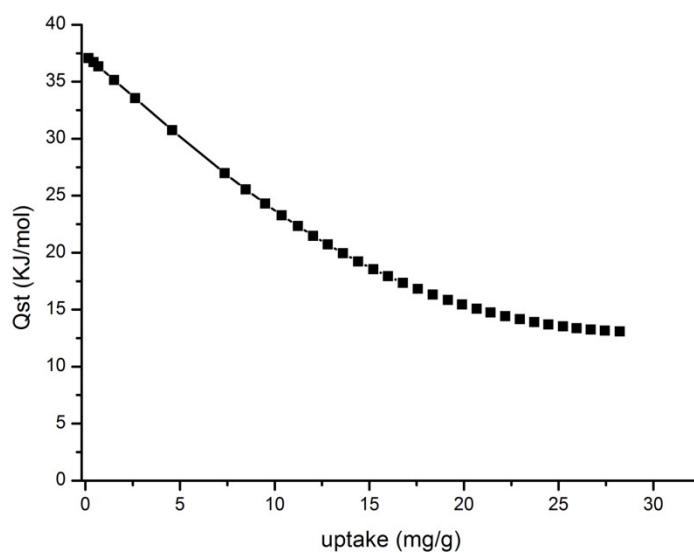

**Figure S23.** Isosteric heat of CO<sub>2</sub> adsorption for **1** estimated by the virial equation from the adsorption isotherms at 273 and 298 K.

## References

1. J. Kim, I.-S. Jung, S.-Y. Kim, E. Lee, J.-K. Kang, S. Sakamoto, K. Yamaguchi, K. Kim, *J. Am. Chem. Soc.* **2000**, *122*, 540-541.
2. G. Mezei, J. W. Kampf, V. L. Pecoraro, *New J. Chem.* **2007**, *31*, 439–446.
3. S. Datta, S. Bhattacharya, *Chem. Eur. J.* **2016**, *22*, 7524-7532.
4. R. M. Ahmed, T. A. Hamdan, A. T. Numan, M. J. Al-Jeboori, H. Potgieter, *Complex Mater.* **2014**, *1*, 38-45.
5. G. M. Sheldrick, SADABS: Area-Detector Absorption Correction; University of Göttingen: Germany, **1996**.
6. G. M. Sheldrick, *Acta Cryst. C*, 2015, *71*, 38.
7. A. L. Spek, *Acta Crystallogr. Sect. C* **2015**, *71*, 9.
8. H. Kim, Y. Kim, M. Yoon, S. Lim, S. M. Park, G. Seo, K. Kim, *J. Am. Chem. Soc.* **2010**, *132*, 12200-12202.
9. J. Tian, J. Liu, P. K. Thallapally, *CrystEngComm* **2013**, *15*, 1528-1531.
10. J. Tian, S. Ma, P. K. Thallapally, D. Fowler, B. P. McGrail and J. L. Atwood, *Chem. Commun.* 2011, **47**, 7626-7628.
11. L.-L. Tan, H. Li, Y. Tao, S. X.-A. Zhang, B. Wang, Y.-W. Yang, *Adv. Mater.* **2014**, *26*, 7027–7031.
12. Z. Zhang, A. Drapailo, Y. Matvieiev, L. Wojtas, M. J. Zaworotko, *Chem. Commun.* **2013**, *49*, 8353--8355.
